# Supplementary material for: Clinical diagnostic value of telomere length measurement in inherited bone marrow failure syndromes
Source: PubMed Central journal article supplement — Haematologica. 2021 Apr 22;106(9):2511–5. doi: 10.3324/haematol.2021.278334 (PMC8409025; doi:10.3324/haematol.2021.278334), 2021-04-22
Supplement: 2021_278334_MIWATA_SUPPL.pdf [file 2021_278334_MIWATA_SUPPL.pdf]

**Clinical diagnostic value of telomere length measurement in inherited bone marrow failure syndromes**

Shunsuke Miwata,<sup>1</sup> Atsushi Narita,<sup>1</sup> Yusuke Okuno,<sup>1,2</sup> Kyogo Suzuki,<sup>1</sup> Motoharu Hamada,<sup>1</sup> Taro Yoshida,<sup>1</sup> Masayuki Imaya,<sup>1</sup> Ayako Yamamori,<sup>1</sup> Manabu Wakamatsu,<sup>1</sup> Kotaro Narita,<sup>1</sup> Hironobu Kitazawa,<sup>1</sup> Daisuke Ichikawa,<sup>1</sup> Rieko Taniguchi,<sup>1</sup> Nozomu Kawashima,<sup>1</sup> Eri Nishikawa,<sup>1</sup> Nobuhiro Nishio,<sup>1,2</sup> Seiji Kojima,<sup>1</sup> Hideki Muramatsu<sup>1</sup> and Yoshiyuki Takahashi<sup>1</sup>

<sup>1</sup>Department of Pediatrics, Nagoya University Graduate School of Medicine and <sup>2</sup>Center for Advanced Medicine and Clinical Research, Nagoya University Hospital, Nagoya, Japan

Correspondence:

HIDEKI MURAMATSU - [hideki-muramatsu@med.nagoya-u.ac.jp](mailto:hideki-muramatsu@med.nagoya-u.ac.jp)

YOSHIYUKI TAKAHASHI - [yatakaha@med.nagoya-u.ac.jp](mailto:yatakaha@med.nagoya-u.ac.jp)

doi:10.3324/haematol.2021.278334

**Supplementary Table 1. Target 184 gene list.**

| Disease categories                          | Gene            |               |                 |               |               |                |
|---------------------------------------------|-----------------|---------------|-----------------|---------------|---------------|----------------|
| Aplastic anemia                             | <i>PRF1</i>     | <i>TERF1</i>  | <i>TERF2</i>    |               |               |                |
| Congenital amegakaryocytic thrombocytopenia | <i>MPL</i>      |               |                 |               |               |                |
| Congenital dyserythropoietic anemia         | <i>CDAN1</i>    | <i>KLF1</i>   | <i>SEC23B</i>   |               |               |                |
| Chromosome fragile syndromes                | <i>ATM</i>      | <i>BLM</i>    | <i>DCLRE1C</i>  | <i>LIG4</i>   | <i>NBN</i>    | <i>RAD50</i>   |
| Diamond-Blackfan anemia                     | <i>GATA1</i>    | <i>RPL31</i>  | <i>RPS10</i>    | <i>RPS19</i>  | <i>RPS29</i>  |                |
|                                             | <i>RPL11</i>    | <i>RPL35A</i> | <i>RPS14</i>    | <i>RPS24</i>  | <i>RPS7</i>   |                |
|                                             | <i>RPL26</i>    | <i>RPL5</i>   | <i>RPS17</i>    | <i>RPS26</i>  |               |                |
| Dyskeratosis congenita                      | <i>C16orf57</i> | <i>DKC1</i>   | <i>NOP10</i>    | <i>TERC</i>   | <i>TINF2</i>  | <i>POT1</i>    |
|                                             | <i>CTC1</i>     | <i>NHP2</i>   | <i>RTEL1</i>    | <i>TERT</i>   | <i>WRAP53</i> | <i>TERF2IP</i> |
| Fanconi anemia                              | <i>BRCA2</i>    | <i>FANCB</i>  | <i>FANCE</i>    | <i>FANCI</i>  | <i>PALB2</i>  |                |
|                                             | <i>BRIP1</i>    | <i>FANCC</i>  | <i>FANCF</i>    | <i>FANCL</i>  | <i>RAD51C</i> |                |
|                                             | <i>FANCA</i>    | <i>FANCD2</i> | <i>FANCG</i>    | <i>FANCM</i>  | <i>SLX4</i>   |                |
| Hemolytic anemia                            | <i>ADA</i>      | <i>ENO1</i>   | <i>GPI</i>      | <i>HBB</i>    | <i>PGK1</i>   | <i>SPTB</i>    |
|                                             | <i>ADD1</i>     | <i>EPB41</i>  | <i>GPX1</i>     | <i>HK1</i>    | <i>PIEZO1</i> | <i>TPI1</i>    |
|                                             | <i>AK1</i>      | <i>EPB42</i>  | <i>GSR</i>      | <i>NT5C3</i>  | <i>PKLR</i>   |                |
|                                             | <i>ALDOA</i>    | <i>G6PD</i>   | <i>GSS</i>      | <i>PFKM</i>   | <i>SLC4A1</i> |                |
|                                             | <i>ANK1</i>     | <i>GCLC</i>   | <i>HBA1</i>     | <i>PGD</i>    | <i>SPTA1</i>  |                |
| Juvenile myelomonocytic leukemia            | <i>ASXL1</i>    | <i>FLT3</i>   | <i>KRAS</i>     | <i>NRAS</i>   | <i>SETBP1</i> |                |
|                                             | <i>CBL</i>      | <i>JAK3</i>   | <i>NF1</i>      | <i>PTPN11</i> |               |                |
| Hematological Malignancies                  | <i>AEBP2</i>    | <i>CSF3R</i>  | <i>EZH2</i>     | <i>KIT</i>    | <i>SF3B1</i>  | <i>U2AF1</i>   |
|                                             | <i>ATRX</i>     | <i>CTCF</i>   | <i>FBXW7</i>    | <i>LAMB4</i>  | <i>SH2B3</i>  | <i>U2AF2</i>   |
|                                             | <i>B2M</i>      | <i>CUX1</i>   | <i>GNAS</i>     | <i>LUC7L2</i> | <i>SMC1A</i>  | <i>UMODL1</i>  |
|                                             | <i>BCOR</i>     | <i>DAXX</i>   | <i>GPRC5A</i>   | <i>MAP3K4</i> | <i>SMC3</i>   | <i>WT1</i>     |
|                                             | <i>BCORL1</i>   | <i>DCAF7</i>  | <i>IDH1</i>     | <i>NCOR2</i>  | <i>SRP72</i>  | <i>ZRSR2</i>   |
|                                             | <i>BRAF</i>     | <i>DIDO1</i>  | <i>IDH2</i>     | <i>NPM1</i>   | <i>SRSF2</i>  | <i>ZSWIM4</i>  |
|                                             | <i>BRCC3</i>    | <i>DIS3</i>   | <i>IRF1</i>     | <i>PHF6</i>   | <i>STAG2</i>  |                |
|                                             | <i>CDH23</i>    | <i>DNMT3A</i> | <i>JAK1</i>     | <i>PRPF8</i>  | <i>STAT3</i>  |                |
|                                             | <i>CEBPA</i>    | <i>EED</i>    | <i>JARID2</i>   | <i>RAD21</i>  | <i>SUZ12</i>  |                |
|                                             | <i>CREBBP</i>   | <i>ETNK1</i>  | <i>KANSL1</i>   | <i>RB1</i>    | <i>TET2</i>   |                |
|                                             | <i>CSMD1</i>    | <i>ETV6</i>   | <i>KDM6A</i>    | <i>RIT1</i>   | <i>TP53</i>   |                |
| MonoMAC syndrome                            | <i>GATA2</i>    |               |                 |               |               |                |
| Myeloproliferative disorder                 | <i>JAK2</i>     |               |                 |               |               |                |
| Neuronal ceroid lipofuscinosis type 2       | <i>TPP1</i>     |               |                 |               |               |                |
| Pancytopenia                                | <i>AK2</i>      | <i>IKZF1</i>  |                 |               |               |                |
| Congenital thrombocytopenia                 | <i>ACTN1</i>    | <i>GP1BA</i>  | <i>ITGA2B</i>   | <i>MYH9</i>   | <i>TUBB1</i>  |                |
|                                             | <i>FLI1</i>     | <i>GP9</i>    | <i>ITGB3</i>    | <i>RUNX1</i>  | <i>VWF</i>    |                |
| Paroximal nocturnal hemoglobinuria          | <i>PIGA</i>     |               |                 |               |               |                |
| Sideroblastic anemia                        | <i>ABCB7</i>    | <i>GLRX5</i>  | <i>SLC19A2</i>  | <i>YARS2</i>  |               |                |
|                                             | <i>ALAS2</i>    | <i>PUS1</i>   | <i>SLC25A38</i> |               |               |                |
| Severe congenital neutropenia               | <i>ELANE</i>    | <i>G6PC3</i>  | <i>GFI1</i>     | <i>HAX1</i>   | <i>VPS45</i>  |                |
| Shwachman-Diamond syndrome                  | <i>SBDS</i>     |               |                 |               |               |                |
| Wiskott-Aldrich syndrome                    | <i>WAS</i>      |               |                 |               |               |                |
| WHIM syndrome                               | <i>CXCR4</i>    |               |                 |               |               |                |
| X-linked lymphoproliferative syndrome       | <i>SH2D1A</i>   | <i>XIAP</i>   |                 |               |               |                |

## Supplementary Table 2. Clinical characteristics of patients with inherited bone marrow failure syndromes (IBMFS).

| UPN | Diagnosis | Age<br>Sex | Triad of DC    |                   |              | Physical anomaly | Gene         | Nucleotide change | Amino acid change | Zygosity | Allelic frequency (GnomAD) | Clinvar ID / Reference      | TL (SD) |
|-----|-----------|------------|----------------|-------------------|--------------|------------------|--------------|-------------------|-------------------|----------|----------------------------|-----------------------------|---------|
|     |           |            | Nail dystrophy | Skin pigmentation | Leuko-plakia |                  |              |                   |                   |          |                            |                             |         |
| 1   | DC        | 2 F        | +              | -                 | -            | +                | <i>TINF2</i> | c.845G>A          | p.R282H           | Hetero   | Not reported               | VCV000005625.1              | 0.83    |
| 2   | DC        | 1 F        | -              | -                 | -            | +                | <i>TINF2</i> | c.845G>A          | p.R282H           | Hetero   | Not reported               | VCV000005625.1              | -5.73   |
| 3   | DC        | 5 F        | +              | -                 | +            | +                | <i>TINF2</i> | c.847C>T          | p.P283S           | Hetero   | Not reported               | VCV000038920.2              | -2.40   |
| 4   | DC        | 7 F        | -              | +                 | -            | +                | <i>TINF2</i> | c.851C>G          | p.T284R           | Hetero   | Not reported               | Alder <i>et al.</i> , 2015  | -4.45   |
| 5   | DC        | 11 F       | -              | -                 | -            | +                | <i>TINF2</i> | c.845G>A          | p.R282H           | Hetero   | Not reported               | VCV000005625.1              | -3.55   |
| 6   | DC        | 2 M        | -              | -                 | -            | -                | <i>TINF2</i> | c.844C>T          | p.R282C           | Hetero   | Not reported               | VCV000005627.3              | -3.61   |
| 7   | DC        | 17 M       | -              | +                 | -            | +                | <i>TERT</i>  | c.1892G>A         | p.R631Q           | Hetero   | Not reported               | VCV000029899.1              | -2.64   |
| 8   | DC        | 6 M        | -              | -                 | -            | +                | <i>TERT</i>  | c.2701C>T         | p.R901W           | Hetero   | Not reported               | VCV000029901.2              | -2.19   |
| 9   | DC        | 19 M       | -              | -                 | -            | -                | <i>TERT</i>  | Deletion          | -                 | Hetero   | Not reported               | -                           | -3.50   |
| 10  | DC        | 12 F       | -              | +                 | -            | +                | -            | -                 | -                 | -        | -                          | -                           | -2.50   |
| 11  | DC        | 11 M       | +              | +                 | -            | +                | -            | -                 | -                 | -        | -                          | -                           | -3.82   |
| 12  | FA        | 10 M       | -              | -                 | -            | -                | <i>FANCA</i> | c.2546delC        | p.S849fs*40       | Homo     | 3.98E-06                   | VCV000408166.3              | -1.84   |
| 13  | FA        | 8 F        | -              | -                 | -            | +                | <i>FANCA</i> | c.2546delC        | p.S849fs*40       | Hemi     | 3.98E-06                   | VCV000408166.3              | -1.89   |
|     |           |            |                |                   |              |                  | <i>FANCA</i> | Deletion          | -                 |          | Not reported               | -                           |         |
| 14  | FA        | 13 M       | -              | -                 | -            | +                | <i>FANCA</i> | c.2470T>C         | p.C824R           | Hetero   | Not reported               | Novel                       | 0.83    |
|     |           |            |                |                   |              |                  | <i>FANCA</i> | c.1418T>C         | p.L473P           | Hetero   | Not reported               | Novel                       |         |
| 15  | FA        | 6 F        | -              | -                 | -            | +                | <i>FANCA</i> | c.2470T>C         | p.C824R           | Hemi     | Not reported               | Novel                       | -0.26   |
|     |           |            |                |                   |              |                  | <i>FANCA</i> | Deletion          | -                 |          | Not reported               | -                           |         |
| 16  | FA        | 3 F        | -              | -                 | -            | +                | <i>FANCA</i> | c.2546delC        | p.S849fs*40       | Hemi     | 3.98E-06                   | VCV000408166.3              | -3.29   |
|     |           |            |                |                   |              |                  | <i>FANCA</i> | Deletion          | -                 |          | Not reported               | -                           |         |
| 17  | FA        | 15 M       | -              | -                 | -            | +                | <i>FANCA</i> | c.2778+1G>A       | -                 | Hetero   | Not reported               | VCV000635518.5              | -1.71   |
|     |           |            |                |                   |              |                  | <i>FANCA</i> | c.2210C>T         | p.A737V           | Hetero   | Not reported               | VCV000456093.1              |         |
| 18  | FA        | 2 M        | -              | -                 | -            | -                | <i>FANCG</i> | c.307+1G>C        | -                 | Homo     | Not reported               | VCV000006714.5              | 2.05    |
| 19  | FA        | 10 M       | -              | -                 | -            | +                | <i>FANCG</i> | c.307+1G>C        | -                 | Homo     | Not reported               | VCV000006714.5              | -4.74   |
| 20  | FA        | 5 F        | -              | -                 | -            | +                | <i>FANCG</i> | c.1066C>T         | p.Q356X           | Hetero   | Not reported               | VCV000006715.6              | -3.58   |
|     |           |            |                |                   |              |                  | <i>FANCG</i> | c.194delC         | p.65fs*7          | Hetero   | Not reported               | VCV000660043.2              |         |
| 21  | DBA       | 1 F        | -              | -                 | -            | -                | <i>RPS19</i> | c.301C>T          | p.R101C           | Hetero   | 3.99E-06                   | Ilenia <i>et al.</i> , 2010 | 0.32    |
| 22  | DBA       | 0 F        | -              | -                 | -            | -                | <i>RPS17</i> | Deletion          | -                 | Hetero   | Not reported               | -                           | 1.21    |
| 23  | DBA       | 6 F        | -              | -                 | -            | +                | <i>RPL5</i>  | c.3+1G>A          | -                 | Hetero   | Not reported               | Novel                       | -2.10   |
| 24  | DBA       | 13 F       | -              | -                 | -            | +                | <i>RPL5</i>  | c.657C>G          | p.Y219X           | Hetero   | Not reported               | Novel                       | -2.83   |
| 25  | SDS       | 6 M        | -              | -                 | -            | +                | <i>SBDS</i>  | c.184A>T          | p.K62X            | Hetero   | 0.000258                   | VCV000449095.5              | -1.99   |
|     |           |            |                |                   |              |                  | <i>SBDS</i>  | c.258+2T>C        | -                 | Hetero   | Not reported               | VCV000003196.15             |         |
| 26* | BS        | 13 M       | -              | -                 | -            | +                | <i>BLM</i>   | c.557_559 delCAA  | p.S186X           | Homo     | Not reported               | VCV000005455.2              | -1.55   |

\*UPN26: A 13-year-old boy presented with anemia and thrombocytopenia. He was receiving growth hormone replacement therapy for short stature associated with extremely low birth weight. General examination revealed a characteristic facial appearance including an erythematous rash on the nose and cheeks, cryptorchidism, urethral malformation, facial stenosis, and a small nose. Bone marrow aspiration showed hypercellularity with moderate dysplasia. Genetic analysis revealed a homozygous mutation in the *BLM* gene, leading to the diagnosis of Bloom's syndrome (BS). IBMFS, inherited bone marrow failure syndromes; UPN, unique patient number; DC, dyskeratosis congenita; TL, telomere length; SD, standard deviation; FA, Fanconi anemia; DBA, Diamond–Blackfan anemia; SDS, Shwachman–Diamond syndrome; BS, Bloom syndrome.

**Supplementary Table 3. Summary of reports analyzed on TL of inherited bone marrow failure syndromes (IBMFS).**

| Reference                         | Age, Median<br>(range) | Patients<br>(N) | Patients of TL<br>shortening (%) | Method        | Threshold               |
|-----------------------------------|------------------------|-----------------|----------------------------------|---------------|-------------------------|
| <b>Fanconi anemia</b>             |                        |                 |                                  |               |                         |
| Ball, 1998                        | ND (4–18)              | 6               | 4 (67)                           | Southern, TRF | <Normal range for age   |
| Hanson, 2001                      | 4.5 (0–11)             | 16              | 15 (94)                          | Q-FISH        | Loss of telomere signal |
| Li, 2003                          | 11 (2–48)              | 71              | 47 (66)                          | Southern      | <200 bp/year            |
| Pavessi, 2009                     | 6 (2–33)               | 9               | 2 (22)                           | Q-PCR         | <1st percentile         |
| Alter, 2015                       | 18 (3–56)              | 30              | 2 (7)                            | Flow-FISH     | <1st percentile         |
| Our data                          | 8 (2–15)               | 9               | 6 (67)                           | Flow-FISH     | <-1.71 SD               |
| <b>Diamond–Blackfan anemia</b>    |                        |                 |                                  |               |                         |
| Pavessi, 2009                     | 2 (0–31)               | 45              | 1 (2)                            | qPCR          | <1st percentile         |
| Du, 2009                          | 12 (0–62)              | 41              | 5 (12)                           | Flow-FISH     | <1st percentile         |
| Alter, 2015                       | 14 (2–58)              | 34              | 1 (3)                            | Flow-FISH     | <1st percentile         |
| Our data                          | 4 (0–13)               | 4               | 2 (50)                           | Flow-FISH     | <-1.71 SD               |
| <b>Shwachman–Diamond syndrome</b> |                        |                 |                                  |               |                         |
| Thornley, 2002                    | 7 (0.5–18)             | 12              | 7 (58)                           | Southern      | <Normal range for age   |
| Du, 2009                          | 20 (2–41)              | 5               | 1 (20)                           | Flow-FISH     | <1st percentile         |
| Alter, 2015                       | 12 (5–42)              | 14              | 2 (14)                           | Flow-FISH     | <1st percentile         |
| Ong, 2018                         | 19                     | 1               | 1 (100)                          | qPCR          | <1st percentile         |
| Our data                          | 6                      | 1               | 1 (100)                          | Flow-FISH     | <-1.71 SD               |

TL, telomere length; IBMFS, inherited bone marrow failure syndromes; ND, not described; SD, standard deviation; TRF, terminal restriction fragment; Flow-FISH, flow-fluorescence in situ hybridization; Q-FISH, quantitative fluorescent in situ hybridization; qPCR, quantitative polymerase chain reaction; Southern, Southern blotting.
